# Supplementary material for: The rate and molecular spectrum of mutation are selectively maintained in yeast
Source: PubMed Central journal article supplement (PMC8245649; doi:10.1038/s41467-021-24364-6), 2021-06-30
Supplement: 41467_2021_24364_MOESM1_ESM.pdf [file 41467_2021_24364_MOESM1_ESM.pdf]

**SUPPLEMENTARY MATERIALS FOR**

**The rate and molecular spectrum of mutation are selectively maintained in yeast**

H. Liu & J. Zhang (jianzhi@umich.edu)

**Supplementary materials include:**

Supplementary Tables 1-8

Supplementary Figures 1-4

**Supplementary Table 1. Summary statistics of yeast strains from the first round of mutation accumulation.**

| <b>Sample</b> | <b># of generations</b> | <b>Sequencing depth</b> | <b># of SNVs</b> | <b># of insertions</b> | <b># of deletions</b> | <b>Total # of mutations</b> | <b># of genes with mutations</b> |
|---------------|-------------------------|-------------------------|------------------|------------------------|-----------------------|-----------------------------|----------------------------------|
| Progenitor    | NA                      | 44.31×                  | NA               | NA                     | NA                    | NA                          | NA                               |
| MA1           | 1435                    | 78.27×                  | 69               | 29                     | 388                   | 486                         | 123                              |
| MA2           | 1528                    | 71.74×                  | 64               | 87                     | 667                   | 818                         | 135                              |
| MA3           | 1535                    | 67.25×                  | 78               | 82                     | 734                   | 894                         | 183                              |
| MA5           | 1515                    | 135.73×                 | 172              | 102                    | 604                   | 878                         | 211                              |
| MA6           | 1452                    | 47.34×                  | 182              | 102                    | 644                   | 928                         | 228                              |
| MA8           | 1498                    | 46.71×                  | 124              | 79                     | 723                   | 926                         | 184                              |
| MA9           | 1528                    | 78.35×                  | 94               | 79                     | 675                   | 848                         | 163                              |
| MA10          | 1544                    | 104.64×                 | 96               | 82                     | 606                   | 784                         | 158                              |
| MA11          | 1475                    | 64.34×                  | 143              | 80                     | 693                   | 916                         | 204                              |
| MA12          | 1510                    | 29.99×                  | 157              | 89                     | 544                   | 790                         | 195                              |
| MA13          | 1520                    | 93.15×                  | 120              | 55                     | 529                   | 704                         | 160                              |
| MA14          | 1544                    | 130.88×                 | 170              | 105                    | 786                   | 1061                        | 236                              |
| MA15          | 1515                    | 103.08×                 | 113              | 90                     | 745                   | 948                         | 190                              |
| MA16          | 1475                    | 120.1×                  | 66               | 81                     | 659                   | 806                         | 152                              |
| MA17          | 1510                    | 73.83×                  | 88               | 62                     | 759                   | 909                         | 178                              |
| MA19          | 1475                    | 104.98×                 | 107              | 93                     | 715                   | 915                         | 187                              |
| MA20          | 1535                    | 103.18×                 | 109              | 104                    | 756                   | 969                         | 197                              |
| MA21          | 1584                    | 79.30×                  | 98               | 84                     | 773                   | 955                         | 184                              |
| MA22          | 1612                    | 236.62×                 | 110              | 81                     | 709                   | 900                         | 175                              |
| MA23          | 1435                    | 125.04×                 | 140              | 72                     | 352                   | 564                         | 154                              |
| MA24          | 1550                    | 105.33×                 | 178              | 103                    | 805                   | 1086                        | 232                              |
| MA25          | 1504                    | 88.51×                  | 158              | 121                    | 668                   | 947                         | 223                              |
| MA26          | 1555                    | 63.60×                  | 163              | 96                     | 730                   | 989                         | 225                              |
| MA27          | 1452                    | 105.70×                 | 82               | 87                     | 715                   | 884                         | 159                              |
| MA28          | 1535                    | 92.06×                  | 59               | 53                     | 608                   | 720                         | 121                              |
| MA29          | 1603                    | 105.16×                 | 74               | 72                     | 685                   | 831                         | 142                              |
| MA30          | 1464                    | 230.78×                 | 236              | 113                    | 721                   | 1070                        | 291                              |
| MA31          | 1515                    | 97.44×                  | 110              | 102                    | 776                   | 988                         | 202                              |
| MA32          | 1538                    | 60.02×                  | 249              | 119                    | 834                   | 1202                        | 332                              |
| MA33          | 1484                    | 63.25×                  | 85               | 57                     | 741                   | 883                         | 172                              |
| MA34          | 1547                    | 84.34×                  | 63               | 48                     | 575                   | 686                         | 123                              |
| MA35          | 1492                    | 60.22×                  | 144              | 95                     | 692                   | 931                         | 217                              |
| MA38          | 1535                    | 91.65×                  | 128              | 98                     | 757                   | 983                         | 218                              |
| MA39          | 1464                    | 236.20×                 | 82               | 77                     | 669                   | 828                         | 151                              |
| MA40          | 1544                    | 92.81×                  | 211              | 158                    | 741                   | 1110                        | 278                              |
| MA41          | 1557                    | 82.31×                  | 108              | 78                     | 696                   | 882                         | 197                              |
| MA42          | 1541                    | 85.30×                  | 105              | 77                     | 707                   | 889                         | 160                              |
| MA43          | 1570                    | 47.03×                  | 158              | 110                    | 727                   | 995                         | 240                              |
| MA44          | 1524                    | 73.82×                  | 109              | 102                    | 750                   | 961                         | 191                              |

|      |      |         |     |     |     |      |     |
|------|------|---------|-----|-----|-----|------|-----|
| MA45 | 1504 | 105.52× | 130 | 111 | 731 | 972  | 216 |
| MA46 | 1535 | 71.60×  | 96  | 106 | 715 | 917  | 174 |
| MA47 | 1498 | 87.27×  | 99  | 84  | 674 | 857  | 164 |
| MA48 | 1475 | 70.89×  | 115 | 113 | 700 | 928  | 205 |
| MA49 | 1538 | 68.41×  | 192 | 114 | 689 | 995  | 258 |
| MA50 | 1484 | 49.62×  | 126 | 85  | 640 | 851  | 177 |
| MA51 | 1538 | 123.24× | 62  | 67  | 640 | 769  | 138 |
| MA52 | 1464 | 89.74×  | 92  | 69  | 722 | 883  | 173 |
| MA53 | 1435 | 66.44×  | 106 | 66  | 645 | 817  | 167 |
| MA54 | 1412 | 70.33×  | 136 | 102 | 722 | 960  | 217 |
| MA55 | 1524 | 87.94×  | 52  | 43  | 509 | 604  | 119 |
| MA56 | 1510 | 68.62×  | 93  | 56  | 696 | 845  | 166 |
| MA57 | 1532 | 88.24×  | 72  | 73  | 760 | 905  | 162 |
| MA58 | 1560 | 132.53× | 119 | 91  | 806 | 1016 | 218 |
| MA59 | 1560 | 163.17× | 102 | 103 | 636 | 841  | 167 |
| MA60 | 1484 | 72.40×  | 88  | 88  | 689 | 865  | 168 |
| MA61 | 1475 | 175.62× | 104 | 99  | 744 | 947  | 188 |
| MA62 | 1452 | 109.87× | 129 | 74  | 677 | 880  | 179 |
| MA63 | 1550 | 76.51×  | 119 | 64  | 746 | 929  | 197 |
| MA64 | 1412 | 62.29×  | 104 | 54  | 651 | 809  | 166 |
| MA65 | 1498 | 233.19× | 144 | 98  | 615 | 857  | 196 |
| MA66 | 1550 | 25.49×  | 88  | 50  | 425 | 563  | 128 |
| MA67 | 1484 | 67.76×  | 143 | 125 | 683 | 951  | 205 |
| MA68 | 1544 | 126.37× | 89  | 71  | 687 | 847  | 160 |
| MA69 | 1412 | 98.77×  | 108 | 94  | 704 | 906  | 200 |
| MA70 | 1372 | 45.61×  | 71  | 72  | 523 | 666  | 140 |
| MA71 | 1492 | 60.37×  | 110 | 65  | 476 | 651  | 152 |
| MA72 | 1524 | 65.11×  | 122 | 97  | 602 | 821  | 197 |
| MA73 | 1538 | 186.73× | 95  | 58  | 813 | 966  | 165 |
| MA74 | 1528 | 143.57× | 66  | 68  | 701 | 835  | 151 |
| MA75 | 1412 | 95.13×  | 81  | 85  | 645 | 811  | 152 |
| MA76 | 1544 | 122.19× | 184 | 145 | 676 | 1005 | 250 |
| MA77 | 1532 | 101.98× | 99  | 92  | 711 | 902  | 174 |
| MA78 | 1532 | 113.34× | 70  | 85  | 704 | 859  | 147 |
| MA79 | 1555 | 101.89× | 85  | 96  | 716 | 897  | 160 |
| MA80 | 1524 | 80.93×  | 69  | 57  | 664 | 790  | 139 |
| MA81 | 1515 | 78.94×  | 75  | 75  | 678 | 828  | 161 |
| MA82 | 1528 | 68.98×  | 81  | 102 | 668 | 851  | 152 |
| MA83 | 1524 | 84.81×  | 189 | 113 | 690 | 992  | 257 |
| MA85 | 1532 | 117.39× | 114 | 80  | 690 | 884  | 191 |
| MA86 | 1464 | 103.00× | 166 | 92  | 746 | 1004 | 245 |
| MA88 | 1524 | 99.84×  | 115 | 91  | 664 | 870  | 174 |
| MA89 | 1552 | 96.14×  | 118 | 119 | 675 | 912  | 191 |
| MA90 | 1535 | 36.86×  | 79  | 58  | 706 | 843  | 163 |
| MA91 | 1535 | 44.68×  | 119 | 101 | 662 | 882  | 198 |

---

|       |      |         |     |     |     |     |     |
|-------|------|---------|-----|-----|-----|-----|-----|
| MA92  | 1541 | 100.94× | 99  | 79  | 683 | 861 | 192 |
| MA93  | 1555 | 66.62×  | 131 | 122 | 651 | 904 | 194 |
| MA94  | 1552 | 85.92×  | 128 | 99  | 685 | 912 | 193 |
| MA95  | 1372 | 86.80×  | 113 | 95  | 741 | 949 | 192 |
| MA96  | 1498 | 181.65× | 159 | 86  | 638 | 883 | 217 |
| MA97  | 1515 | 56.27×  | 118 | 88  | 655 | 861 | 182 |
| MA98  | 1504 | 94.26×  | 120 | 91  | 663 | 874 | 185 |
| MA99  | 1557 | 178.49× | 131 | 72  | 613 | 816 | 193 |
| MA100 | 1520 | 65.48×  | 131 | 82  | 664 | 877 | 219 |

---

**Supplementary Table 2. Summary statistics of yeast strains from the second round of mutation accumulation.**

| <b>Strain</b> | <b># of replicate lines</b> | <b># of generations per line</b> | <b># of SNVs*</b> | <b># of insertions*</b> | <b># of deletions*</b> | <b>Total # of mutations*</b> |
|---------------|-----------------------------|----------------------------------|-------------------|-------------------------|------------------------|------------------------------|
| BY4741        | 20                          | 1011.1                           | 120               | 10                      | 12                     | 142                          |
| BY4743        | 20                          | 1029.08                          | 280               | 7                       | 21                     | 308                          |
| MA15          | 19                          | 675.6                            | 1368              | 886                     | 4530                   | 6784                         |
| MA21          | 4                           | 665.5                            | 142               | 120                     | 1040                   | 1302                         |
| MA23          | 17                          | 638.5                            | 131               | 13                      | 9                      | 153                          |
| MA25          | 3                           | 499.7                            | 10                | 3                       | 0                      | 13                           |
| MA28          | 19                          | 868.7                            | 55                | 2                       | 3                      | 60                           |
| MA29          | 8                           | 692.9                            | 69                | 4                       | 2                      | 75                           |
| MA33          | 20                          | 719.6                            | 108               | 7                       | 0                      | 115                          |
| MA38          | 20                          | 970.2                            | 53                | 5                       | 2                      | 60                           |
| MA44          | 20                          | 637.0                            | 82                | 7                       | 14                     | 103                          |
| MA45          | 4                           | 496.8                            | 26                | 8                       | 3                      | 37                           |
| MA51          | 3                           | 508.4                            | 35                | 11                      | 5                      | 51                           |
| MA56          | 4                           | 512.9                            | 25                | 7                       | 1                      | 33                           |
| MA63          | 1                           | 712.6                            | 40                | 1                       | 0                      | 41                           |
| MA64          | 20                          | 491.6                            | 206               | 5                       | 9                      | 220                          |
| MA92          | 4                           | 688.6                            | 37                | 4                       | 1                      | 42                           |
| MA94          | 3                           | 507.2                            | 28                | 4                       | 2                      | 34                           |

\*Combined from all replicate lines.

**Supplementary Table 3. Origins and *CAN1* mutation frequencies of 7 natural yeast strains.**

| <b>Strain</b>    | <b>Mutation frequency*</b> | <b>Origin</b>        |
|------------------|----------------------------|----------------------|
| CBS2888a         | $1.1 \times 10^{-7}$       | Soil, South Africa   |
| BY4724           | $1.7 \times 10^{-7}$       | Lab derived          |
| YJM454a          | $1.7 \times 10^{-7}$       | Human, clinical      |
| Clib219 (YST195) | $1.7 \times 10^{-7}$       | Wine, Russia         |
| 273614N (YST133) | $2.2 \times 10^{-7}$       | Human, clinical      |
| I14              | $2.8 \times 10^{-7}$       | Vineyard soil, Italy |
| RM11-1a          | $5.8 \times 10^{-7}$       | Vineyard, U.S.       |

\*Data from Gou *et al. Genetics* **211**, 731-740 (2019).

**Supplementary Table 4. Test of stabilizing selection of the mutation rate in yeast.**

|                                                              | $V_m$                       |                             |                             | $V_{mL}$                    |                             |                             | $V_{mH}$                    |                             |                             |
|--------------------------------------------------------------|-----------------------------|-----------------------------|-----------------------------|-----------------------------|-----------------------------|-----------------------------|-----------------------------|-----------------------------|-----------------------------|
|                                                              | $V_{m1}$                    | $V_{m2}$                    | $V_{m3}$                    | $V_{mL1}$                   | $V_{mL2}$                   | $V_{mL3}$                   | $V_{mH1}$                   | $V_{mH2}$                   | $V_{mH3}$                   |
| <b>CANI-based tests</b> ( $V_g$ : $2.13 \times 10^{-14}$ )   |                             |                             |                             |                             |                             |                             |                             |                             |                             |
| Mutational variance                                          | $4.7 \times 10^{-17}$       | $8.5 \times 10^{-18}$       | $3.1 \times 10^{-16}$       | $8.4 \times 10^{-20}$       | $1.5 \times 10^{-20}$       | $5.4 \times 10^{-19}$       | $6.2 \times 10^{-17}$       | $1.1 \times 10^{-17}$       | $4.0 \times 10^{-16}$       |
| $V_g/V_m$ (neutral expectation: $4 \times 10^7$ )            | $4.5 \times 10^2 \text{ ¶}$ | $2.5 \times 10^3 \text{ ¶}$ | $7.0 \times 10^1 \text{ ¶}$ | $2.5 \times 10^5 \text{ ¶}$ | $1.4 \times 10^6 \text{ ¶}$ | $3.9 \times 10^4 \text{ ¶}$ | $3.5 \times 10^2 \text{ ¶}$ | $1.9 \times 10^3 \text{ ¶}$ | $5.4 \times 10^1 \text{ ¶}$ |
| <b>MA+WGS-based tests</b> ( $D^2$ : $1.50 \times 10^{-20}$ ) |                             |                             |                             |                             |                             |                             |                             |                             |                             |
| Mutational variance                                          | $2.2 \times 10^{-23}$       | $4.0 \times 10^{-24}$       | $1.4 \times 10^{-22}$       | $9.9 \times 10^{-26}$       | $1.8 \times 10^{-26}$       | $6.4 \times 10^{-25}$       | $2.4 \times 10^{-23}$       | $4.2 \times 10^{-24}$       | $1.5 \times 10^{-22}$       |
| $D^2/V_m$ (neutral expectation: $2.89 \times 10^9$ )         | $6.7 \times 10^2 \text{ ¶}$ | $3.7 \times 10^3 \text{ ¶}$ | $1.0 \times 10^2 \text{ ¶}$ | $1.5 \times 10^5 \text{ *}$ | $8.5 \times 10^5 \text{ *}$ | $2.4 \times 10^4 \text{ *}$ | $6.4 \times 10^2 \text{ ¶}$ | $3.5 \times 10^3 \text{ ¶}$ | $9.8 \times 10^1 \text{ ¶}$ |

Same as Table 1 except that mutation frequencies/rates are not  $\log_{10}$ -transformed in the test. *CANI*-based intraspecific mutation rate variance  $V_g$  is from 7 natural strains while  $V_m$  is from 44 haploid MA lines. MA+WGS-based  $D^2$  is the squared difference in SNV mutation rate between *S. cerevisiae* and *S. paradoxus*, while  $V_m$  is based on the SNV mutation rates of 16 MA lines. All  $V_g/V_m$  and  $D^2/V_m$  ratios are significantly below the corresponding neutral expectations based on bootstrap tests (\*,  $P < 0.001$ ; ¶,  $P < 0.0001$ ).

**Supplementary Table 5. Top 27 candidate mutator genes.**

| <b>Gene ID</b> | <b>Gene name</b> | <b>Mutator index*</b> | <b>Annotated function&amp;</b>                                              |
|----------------|------------------|-----------------------|-----------------------------------------------------------------------------|
| YDR217C        | <i>RAD9</i>      | 0.44                  | DNA damage-dependent checkpoint protein                                     |
| YFL013W-A      |                  | 0.36                  | Dubious open reading frame                                                  |
| YML017W        | <i>PSP2</i>      | 0.36                  | Polymerase SuPpressor                                                       |
| YDL036C        | <i>PUS9</i>      | 0.31                  | Mitochondrial tRNA:pseudouridine synthase                                   |
| YJL131C        | <i>AIM23</i>     | 0.31                  | Mitochondrial translation initiation factor 3                               |
| YOR034C-A      |                  | 0.31                  | Putative protein of unknown function                                        |
| YDL034W        |                  | 0.28                  | Dubious open reading frame                                                  |
| YJL182C        |                  | 0.28                  | Dubious open reading frame                                                  |
| YJR119C        | <i>JHD2</i>      | 0.28                  | JmjC domain family histone demethylase                                      |
| YBR147W        | <i>RTC2</i>      | 0.25                  | Putative vacuolar membrane transporter for cationic amino acids             |
| YHR095W        |                  | 0.25                  | Dubious open reading frame                                                  |
| YLR061W        | <i>RPL22A</i>    | 0.25                  | Ribosomal 60S subunit protein L22A                                          |
| YNR065C        |                  | 0.25                  | Protein of unknown function                                                 |
| YOR304W        | <i>ISW2</i>      | 0.25                  | ATP-dependent DNA translocase involved in chromatin remodeling              |
| YOR219C        | <i>STE13</i>     | 0.25                  | Dipeptidyl aminopeptidase                                                   |
| YJR094W-A      | <i>RPL43B</i>    | 0.25                  | Ribosomal 60S subunit protein L43B                                          |
| YFL039C        | <i>ACT1</i>      | 0.22                  | Actin; structural protein involved in cell polarization                     |
| YNL067W-B      |                  | 0.22                  | Putative protein of unknown function                                        |
| YDR223W        | <i>CRF1</i>      | 0.22                  | involved in repression of ribosomal protein (RP) gene transcription         |
| YBL012C        |                  | 0.22                  | Dubious open reading frame                                                  |
| YDL196W        |                  | 0.22                  | Dubious open reading frame                                                  |
| YFL003C        | <i>MSH4</i>      | 0.22                  | Protein involved in meiotic recombination                                   |
| YJR050W        | <i>ISY1</i>      | 0.22                  | Member of the NineTeen Complex (NTC)                                        |
| YJR131W        | <i>MNS1</i>      | 0.22                  | Alpha-1,2-mannosidase; involved in ER-associated protein degradation (ERAD) |
| YLR341W        | <i>SPO77</i>     | 0.22                  | Meiosis-specific protein of unknown function                                |
| YNL012W        | <i>SPO1</i>      | 0.22                  | Meiosis-specific prospore protein                                           |
| YOR380W        | <i>RDR1</i>      | 0.22                  | Transcriptional repressor involved in regulating multidrug resistance       |

\*The mutator index of a gene is defined by  $m_L/n_L - m_H/n_H$ , where  $n_L$  is the number of MA lines with lower  $\mu$  than the progenitor,  $m_L$  is the number of MA lines with lower  $\mu$  than the progenitor and frameshift mutations in the focal gene,  $n_H$  is the number of MA lines with higher  $\mu$  than the progenitor, and  $m_H$  is the number of MA lines with higher  $\mu$  than the progenitor and frameshift mutations in the focal gene.

&Information retrieved from *Saccharomyces* genome database (www.yeastgenome.org).



**Supplementary Table 6. Test of stabilizing selection of the yeast mutation spectrum.**

| Trait              | $V_g$                 | $V_{m1}$              | $V_{m2}$              | $V_{m3}$              | $V_g/V_{m1}$       | $V_g/V_{m2}$       | $V_g/V_{m3}$       |
|--------------------|-----------------------|-----------------------|-----------------------|-----------------------|--------------------|--------------------|--------------------|
| SNV fraction       | $2.72 \times 10^{-3}$ | $4.95 \times 10^{-7}$ | $8.88 \times 10^{-8}$ | $3.19 \times 10^{-6}$ | $5.52 \times 10^3$ | $3.07 \times 10^4$ | $8.56 \times 10^2$ |
| Insertion fraction | $2.80 \times 10^{-5}$ | $4.37 \times 10^{-8}$ | $7.84 \times 10^{-9}$ | $2.82 \times 10^{-7}$ | $6.41 \times 10^2$ | $3.57 \times 10^3$ | $9.94 \times 10^1$ |
| Deletion fraction  | $2.59 \times 10^{-3}$ | $4.41 \times 10^{-7}$ | $7.92 \times 10^{-8}$ | $2.85 \times 10^{-6}$ | $5.87 \times 10^3$ | $3.27 \times 10^4$ | $9.10 \times 10^2$ |
| A:T→C:G fraction   | $1.26 \times 10^{-3}$ | $2.62 \times 10^{-8}$ | $4.70 \times 10^{-9}$ | $1.69 \times 10^{-7}$ | $4.82 \times 10^4$ | $2.68 \times 10^5$ | $7.47 \times 10^3$ |
| A:T→T:A fraction   | $3.87 \times 10^{-4}$ | $1.83 \times 10^{-8}$ | $3.29 \times 10^{-9}$ | $1.18 \times 10^{-7}$ | $2.11 \times 10^4$ | $1.18 \times 10^5$ | $3.28 \times 10^3$ |
| C:G→G:C fraction   | $2.21 \times 10^{-3}$ | $4.39 \times 10^{-8}$ | $7.88 \times 10^{-9}$ | $2.83 \times 10^{-7}$ | $5.04 \times 10^4$ | $2.81 \times 10^5$ | $7.81 \times 10^3$ |
| G:C→A:T fraction   | $1.31 \times 10^{-3}$ | $9.48 \times 10^{-8}$ | $1.70 \times 10^{-8}$ | $6.11 \times 10^{-7}$ | $1.38 \times 10^4$ | $7.70 \times 10^4$ | $2.14 \times 10^3$ |
| G:C→T:A fraction   | $1.00 \times 10^{-2}$ | $4.14 \times 10^{-8}$ | $7.43 \times 10^{-9}$ | $2.67 \times 10^{-7}$ | $2.42 \times 10^5$ | $1.35 \times 10^6$ | $3.75 \times 10^4$ |
| T:A→C:G fraction   | $2.38 \times 10^{-4}$ | $4.37 \times 10^{-8}$ | $7.85 \times 10^{-9}$ | $2.82 \times 10^{-7}$ | $5.44 \times 10^3$ | $3.03 \times 10^4$ | $8.44 \times 10^2$ |
| Ts/Tv              | $2.34 \times 10^{-2}$ | $1.43 \times 10^{-6}$ | $2.56 \times 10^{-7}$ | $9.21 \times 10^{-5}$ | $1.64 \times 10^4$ | $9.13 \times 10^4$ | $2.54 \times 10^3$ |
| AT bias            | 0.711                 | $1.26 \times 10^{-5}$ | $2.27 \times 10^{-6}$ | $8.14 \times 10^{-5}$ | $5.63 \times 10^4$ | $3.14 \times 10^5$ | $8.73 \times 10^3$ |

All  $V_g/V_{m1}$ ,  $V_g/V_{m2}$ , and  $V_g/V_{m3}$  ratios are significantly below the neutral expectation of  $4 \times 10^7$  ( $P < 0.001$  based on 10,000 bootstraps of natural strains as well as MA lines).

**Supplementary Table 7. Test of stabilizing selection of the yeast mutation spectrum based on log<sub>10</sub>-transformed trait values.**

| Trait              | $V_g$                 | $V_{m1}$              | $V_{m2}$              | $V_{m3}$              | $V_g/V_{m1}$       | $V_g/V_{m2}$       | $V_g/V_{m3}$       |
|--------------------|-----------------------|-----------------------|-----------------------|-----------------------|--------------------|--------------------|--------------------|
| SNV fraction       | $6.45 \times 10^{-4}$ | $5.53 \times 10^{-7}$ | $9.93 \times 10^{-8}$ | $3.57 \times 10^{-6}$ | $1.17 \times 10^3$ | $6.50 \times 10^3$ | $1.81 \times 10^2$ |
| Insertion fraction | $2.24 \times 10^{-2}$ | $9.24 \times 10^{-7}$ | $1.66 \times 10^{-7}$ | $5.96 \times 10^{-6}$ | $2.43 \times 10^4$ | $1.35 \times 10^5$ | $3.76 \times 10^3$ |
| Deletion fraction  | $9.80 \times 10^{-2}$ | $2.16 \times 10^{-6}$ | $3.88 \times 10^{-7}$ | $1.39 \times 10^{-5}$ | $4.53 \times 10^4$ | $2.53 \times 10^5$ | $7.03 \times 10^3$ |
| A:T→C:G fraction   | $1.80 \times 10^{-2}$ | $4.16 \times 10^{-7}$ | $7.47 \times 10^{-8}$ | $2.69 \times 10^{-6}$ | $4.32 \times 10^4$ | $2.41 \times 10^5$ | $6.70 \times 10^3$ |
| A:T→T:A fraction   | $2.19 \times 10^{-2}$ | $4.50 \times 10^{-7}$ | $8.08 \times 10^{-8}$ | $2.90 \times 10^{-6}$ | $4.86 \times 10^4$ | $2.71 \times 10^5$ | $7.54 \times 10^3$ |
| C:G→G:C fraction   | $7.61 \times 10^{-2}$ | $1.26 \times 10^{-6}$ | $2.27 \times 10^{-7}$ | $8.15 \times 10^{-6}$ | $6.03 \times 10^4$ | $3.36 \times 10^5$ | $9.34 \times 10^3$ |
| G:C→A:T fraction   | $2.81 \times 10^{-3}$ | $4.79 \times 10^{-7}$ | $8.60 \times 10^{-8}$ | $3.09 \times 10^{-6}$ | $5.87 \times 10^3$ | $3.27 \times 10^4$ | $9.10 \times 10^2$ |
| G:C→T:A fraction   | $2.16 \times 10^{-2}$ | $3.73 \times 10^{-7}$ | $6.70 \times 10^{-8}$ | $2.41 \times 10^{-6}$ | $5.79 \times 10^4$ | $3.23 \times 10^5$ | $8.98 \times 10^3$ |
| T:A→C:G fraction   | $3.02 \times 10^{-3}$ | $1.45 \times 10^{-7}$ | $2.61 \times 10^{-8}$ | $9.37 \times 10^{-7}$ | $2.08 \times 10^4$ | $1.16 \times 10^5$ | $3.22 \times 10^3$ |
| Ts/Tv              | $8.06 \times 10^{-3}$ | $2.31 \times 10^{-7}$ | $4.15 \times 10^{-8}$ | $1.49 \times 10^{-6}$ | $3.49 \times 10^4$ | $1.49 \times 10^5$ | $5.41 \times 10^3$ |
| AT bias            | $1.61 \times 10^{-2}$ | $8.68 \times 10^{-7}$ | $1.56 \times 10^{-7}$ | $5.60 \times 10^{-6}$ | $1.86 \times 10^4$ | $1.03 \times 10^5$ | $2.88 \times 10^3$ |

Same as Supplementary Table 6 except that all trait values are log<sub>10</sub>-transformed for computing  $V_g$  and  $V_m$ . All  $V_g/V_{m1}$ ,  $V_g/V_{m2}$ , and  $V_g/V_{m3}$  ratios are significantly below the neutral expectation of  $4 \times 10^7$  ( $P < 0.0001$  based on 10,000 bootstraps of natural strains as well as MA lines).

**Supplementary Table 8. List of primers used in this study.**

| <b>Name</b>                  | <b>Sequence</b>                                                       | <b>Annotation</b>                                                                                              |
|------------------------------|-----------------------------------------------------------------------|----------------------------------------------------------------------------------------------------------------|
| <b>MSH2_<br/>repair_U1</b>   | <u>TCT GCT GAC CTA ACA TCA AAA T</u>                                  | Used to synthesize the repair fragment that used for the reinsertion of the whole CDS of MSH2 (Forward primer) |
| <b>MSH2_<br/>repair_L1</b>   | <u>CTA TCG ATT CTC ACT TAA GAT G</u>                                  | Used to synthesize the repair fragment that used for the reinsertion of the whole CDS of MSH2 (Reverse primer) |
| <b>MSH2_<br/>repair_U2</b>   | AAT CAG AAC TCC AGC ACT CCG                                           | Used to synthesize the repair fragment that used for the reinsertion of the whole CDS of MSH2 (Forward primer) |
| <b>MSH2_<br/>repair_L2</b>   | CCC ATC CAT AGT TCT GAT ACC G                                         | Used to synthesize the repair fragment that used for the reinsertion of the whole CDS of MSH2 (Reverse primer) |
| <b>RAD9_<br/>repair_U</b>    | tATTTAATCGTCCCTTTCTATCAATTATGAG<br>TTTATATATTTTTATAATTAGCCCTGATG      | Used to synthesize the repair fragment that used to knockout the whole CDS of RAD9 (Forward primer)            |
| <b>RAD9_<br/>repair_L</b>    | AGAAACGCCATAGAAAAGAGCATAGTGA<br>GAAAATCTTCAACATCAGGGGCTAATTATA<br>AAA | Used to synthesize the repair fragment that used to knockout the whole CDS of RAD9 (Reverse primer)            |
| <b>YFL013W_<br/>repair_U</b> | TTTAAAAATTAGCTGTTTTTTTTTaaaaa<br>TTCTCTTTCTTTACAAACTGCGTTCCG          | Used to synthesize the repair fragment that used to knockout the whole CDS of YFL013W-A (Forward primer)       |
| <b>YFL013W_<br/>repair_L</b> | GAAGATGGTGCACCTGCTGGAAAGTTCA<br>TTTTAAGGTGTACGGAACGCAGTTTGTA<br>AGA   | Used to synthesize the repair fragment that used to knockout the whole CDS of YFL-13W-A (Reverse primer)       |
| <b>PSP2_<br/>repair_U</b>    | CACGTTTGCTCACTCGATCTTAATCACAT<br>AGAGTGCTGGAACGGGAAGAAGCGGTA<br>ACTA  | Used to synthesize the repair fragment that used to knockout the whole CDS of PSP2 (Forward primer)            |
| <b>PSP2_<br/>repair_L</b>    | TCATAAAGGCATGTCTGTTGTTCTGTTATT<br>GTAGTTGGAGTAGTTACCGCTTCTTCCCG<br>T  | Used to synthesize the repair fragment that used to knockout the whole CDS of PSP2 (Reverse primer)            |
| <b>MSH4_<br/>repair_U</b>    | TCTGTACAGAAATAATGGATTATAGTTTTA<br>AGCTAAGCGGAAAAGCCAAATGCATATA<br>GT  | Used to synthesize the repair fragment that used to knockout the whole CDS of MSH4 (Forward primer)            |

|                            |                                                                       |                                                                                                     |
|----------------------------|-----------------------------------------------------------------------|-----------------------------------------------------------------------------------------------------|
| <b>MSH4_repair_L</b>       | AACTAGTTATAGCATTGAAATCTGTAGCT<br>GATCAACGCAAACCTATATGCATTTGGCTT<br>TT | Used to synthesize the repair fragment that used to knockout the whole CDS of MSH4 (Reverse primer) |
| <b>MSH2_gRNA_U1</b>        | <u>GAT CAA ACA GGA ATC GAA TGC AAC</u><br><u>GTT TTA GAG CTA G</u>    | Used to synthesize the gRNA that used for the reinsertion of MSH2 (Forward primer)                  |
| <b>MSH2_gRNA_L1</b>        | CTA GCT CTA AAA CGT TGC ATT CGA TTC<br>CTG TTT                        | Used to synthesize the gRNA that used for the reinsertion of MSH2 (Reverse primer)                  |
| <b>MSH2_gRNA_U2</b>        | GAT CAC GAC TGA ATC CGG TGA GAA<br>GTT TTA GAG CTA G                  | Used to synthesize the gRNA that used for the reinsertion of MSH2 (Forward primer)                  |
| <b>MSH2_gRNA_L2</b>        | CTA GCT CTA AAA CTT CTC ACC GGA<br>TTC AGT CGT                        | Used to synthesize the gRNA that used for the reinsertion of MSH2 (Reverse primer)                  |
| <b>RAD9_gRNA_U</b>         | GATCCAGACCATTGAATCGCAAGGGTTTT<br>AGAGCTAG                             | Used to synthesize the gRNA that target the gene RAD9 (Forward primer)                              |
| <b>RAD9_gRNA_L</b>         | CTAGCTCTAAAACCCCTTGCATTCAATGG<br>TCTG                                 | Used to synthesize the gRNA that target the gene RAD9 (Reverse primer)                              |
| <b>YFL013W-A_gRNA_U</b>    | GATCTCACTCCAGCTTAAACATGGGTTTT<br>AGAGCTAG                             | Used to synthesize the gRNA that target the gene YFL013W-A (Forward primer)                         |
| <b>YFL013W-A_gRNA_L</b>    | CTAGCTCTAAAACCCATGTTTAAGCTGGA<br>GTGA                                 | Used to synthesize the gRNA that target the gene YFL013W-A (Reverse primer)                         |
| <b>PSP2_gRNA_U</b>         | GATCTGACATCTTGAAACAAACCAGTTTT<br>AGAGCTAG                             | Used to synthesize the gRNA that target the gene PSP2 (Forward primer)                              |
| <b>PSP2_gRNA_L</b>         | CTAGCTCTAAAACCTGGTTTGTTTCAAGAT<br>GTCA                                | Used to synthesize the gRNA that target the gene PSP2 (Reverse primer)                              |
| <b>MSH4_gRNA_U</b>         | GATCTGCCAAGAGACATAAGTACGGTTTT<br>AGAGCTAG                             | Used to synthesize the gRNA that target the gene MSH4 (Forward primer)                              |
| <b>MSH4_gRNA_L</b>         | CTAGCTCTAAAACCGTACTTATGTCTCTT<br>GGCA                                 | Used to synthesize the gRNA that target the gene MSH4 (Reverse primer)                              |
| <b>Psp2_Part1_Repair_U</b> | GTTTGCTCACTCGATCTTAATCACATAGA<br>GTGCTGGAACGGGAAGAAATGTCATTAA<br>TCC  | Used to synthesize the repair fragment that used to knockout the part 1 of PSP2 (Forward primer)    |
| <b>Psp2_Part1_Repair_L</b> | TTGCTGCCTGTTGCAGTGGTTGCCATAGA<br>ATCACTACTAGGGATTAATGACATTTCTTC       | Used to synthesize the repair fragment that used to knockout                                        |

|                                  |                                                                        |                                                                                                  |
|----------------------------------|------------------------------------------------------------------------|--------------------------------------------------------------------------------------------------|
|                                  | C                                                                      | the part 1 of PSP2 (Reverse primer)                                                              |
| <b>Psp2_Part2_Repair_U</b>       | AAGAAAAAATGGAAAATTTACACGTGGA<br>AGATAACAACCCCTGAGGGCAAGAGG<br>GAGTA    | Used to synthesize the repair fragment that used to knockout the part 2 of PSP2 (Forward primer) |
| <b>Psp2_Part2_Repair_L</b>       | CCTTTATAACTGCTGCCATTGGGGCCTCC<br>ACGATATCTATTACTCCCTCTTGCCCTCAG<br>G   | Used to synthesize the repair fragment that used to knockout the part 2 of PSP2 (Reverse primer) |
| <b>Psp2_Part3_Repair_U</b>       | TGAGCAGAACCAAATATAACGGAAACCA<br>TAATAACAATAATGGCAATTTAATAACA<br>GAA    | Used to synthesize the repair fragment that used to knockout the part 3 of PSP2 (Forward primer) |
| <b>Psp2_Part3_Repair_L</b>       | TTAATGGGTCAGTACATGACTCATAAAGG<br>CATGTCTGTTGTTCTGTTATTAATAAATTGCC<br>A | Used to synthesize the repair fragment that used to knockout the part 3 of PSP2 (Reverse primer) |
| <b>Psp2_Part2_gRNA_U</b>         | GATCAAATCGGACGAGTTCAAAGGGTTT<br>TAGAGCTAG                              | Used to synthesize the gRNA that target the part 2 of gene PSP2 (Forward primer)                 |
| <b>Psp2_Part2_gRNA_L</b>         | CTAGCTCTAAAACCCTTTGAACTCGTCCG<br>ATTT                                  | Used to synthesize the gRNA that target the part 2 of gene PSP2 (Reverse primer)                 |
| <b>Psp2_Part3_gRNA_U</b>         | GATCAATCGCGGCGGATATCGTGGGTTTT<br>AGAGCTAG                              | Used to synthesize the gRNA that target the part 3 of gene PSP2 (Forward primer)                 |
| <b>Psp2_Part3_gRNA_L</b>         | CTAGCTCTAAAACCCACGATATCCGCCG<br>GATT                                   | Used to synthesize the gRNA that target the part 3 of gene PSP2 (Reverse primer)                 |
| <b>Mutation_confirmation_1_U</b> | CGCGCGCGTTTGGTAAGTAGG                                                  | Used for PCR of genomic positions that carry mutations                                           |
| <b>Mutation_confirmation_2_U</b> | AGCGCTGTCACTGCTACGACA                                                  | Used for PCR of genomic positions that carry mutations                                           |
| <b>Mutation_confirmation_3_U</b> | TGCAGAGCGTGTCCGGCGTAC                                                  | Used for PCR of genomic positions that carry mutations                                           |
| <b>Mutation_confirmation_4_U</b> | ACGGCTGCTCTACACCTATGTCGT                                               | Used for PCR of genomic positions that carry mutations                                           |
| <b>Mutation_confirmation_5_U</b> | TGCCAGCTGCTACCCAGGGA                                                   | Used for PCR of genomic positions that carry mutations                                           |
| <b>Mutation_confirmation_5_U</b> | TGGCAAACGCGGGGGAGAAG                                                   | Used for PCR of genomic                                                                          |

---

|                                 |                          |                                                        |
|---------------------------------|--------------------------|--------------------------------------------------------|
| <b>Confirmation_6</b>           |                          | positions that carry mutations                         |
| <b>U</b>                        |                          |                                                        |
| <b>Mutation_confirmation_7</b>  | CCGCCCCACGTGCTGGAAAT     | Used for PCR of genomic positions that carry mutations |
| <b>U</b>                        |                          |                                                        |
| <b>Mutation_confirmation_8</b>  | ATGCGGTGCTGTGCTGGCTT     | Used for PCR of genomic positions that carry mutations |
| <b>U</b>                        |                          |                                                        |
| <b>Mutation_confirmation_9</b>  | AGCCCCGAAGAACAACCGAGG    | Used for PCR of genomic positions that carry mutations |
| <b>U</b>                        |                          |                                                        |
| <b>Mutation_confirmation_10</b> | TGCCGACGTTCCAGTCAAGGA    | Used for PCR of genomic positions that carry mutations |
| <b>U</b>                        |                          |                                                        |
| <b>Mutation_confirmation_11</b> | AAGTCAGGCAGCCGTCCCCT     | Used for PCR of genomic positions that carry mutations |
| <b>L</b>                        |                          |                                                        |
| <b>Mutation_confirmation_12</b> | ACCTCATGCGGCGCTACTGA     | Used for PCR of genomic positions that carry mutations |
| <b>L</b>                        |                          |                                                        |
| <b>Mutation_confirmation_13</b> | TCATGCCCCCGTTACACGCC     | Used for PCR of genomic positions that carry mutations |
| <b>L</b>                        |                          |                                                        |
| <b>Mutation_confirmation_14</b> | CATAGTCGCGCGCCCTTGGT     | Used for PCR of genomic positions that carry mutations |
| <b>L</b>                        |                          |                                                        |
| <b>Mutation_confirmation_15</b> | CGATGGCCGCACTCACACCA     | Used for PCR of genomic positions that carry mutations |
| <b>L</b>                        |                          |                                                        |
| <b>Mutation_confirmation_16</b> | TCGGGCAATCCAAGAGCGCC     | Used for PCR of genomic positions that carry mutations |
| <b>L</b>                        |                          |                                                        |
| <b>Mutation_confirmation_17</b> | GGACCGGCCCATCAGAAGCA     | Used for PCR of genomic positions that carry mutations |
| <b>L</b>                        |                          |                                                        |
| <b>Mutation_confirmation_18</b> | CGGTTCTGAAGCGGCTTCTTGT   | Used for PCR of genomic positions that carry mutations |
| <b>L</b>                        |                          |                                                        |
| <b>Mutation_confirmation_19</b> | ACCCATTCTCCATGGCAAC      | Used for PCR of genomic positions that carry mutations |
| <b>L</b>                        |                          |                                                        |
| <b>Mutation_confirmation_20</b> | TCGTCATAACCCGTTTCAGTTCCT | Used for PCR of genomic positions that carry mutations |
| <b>0L</b>                       |                          |                                                        |

---

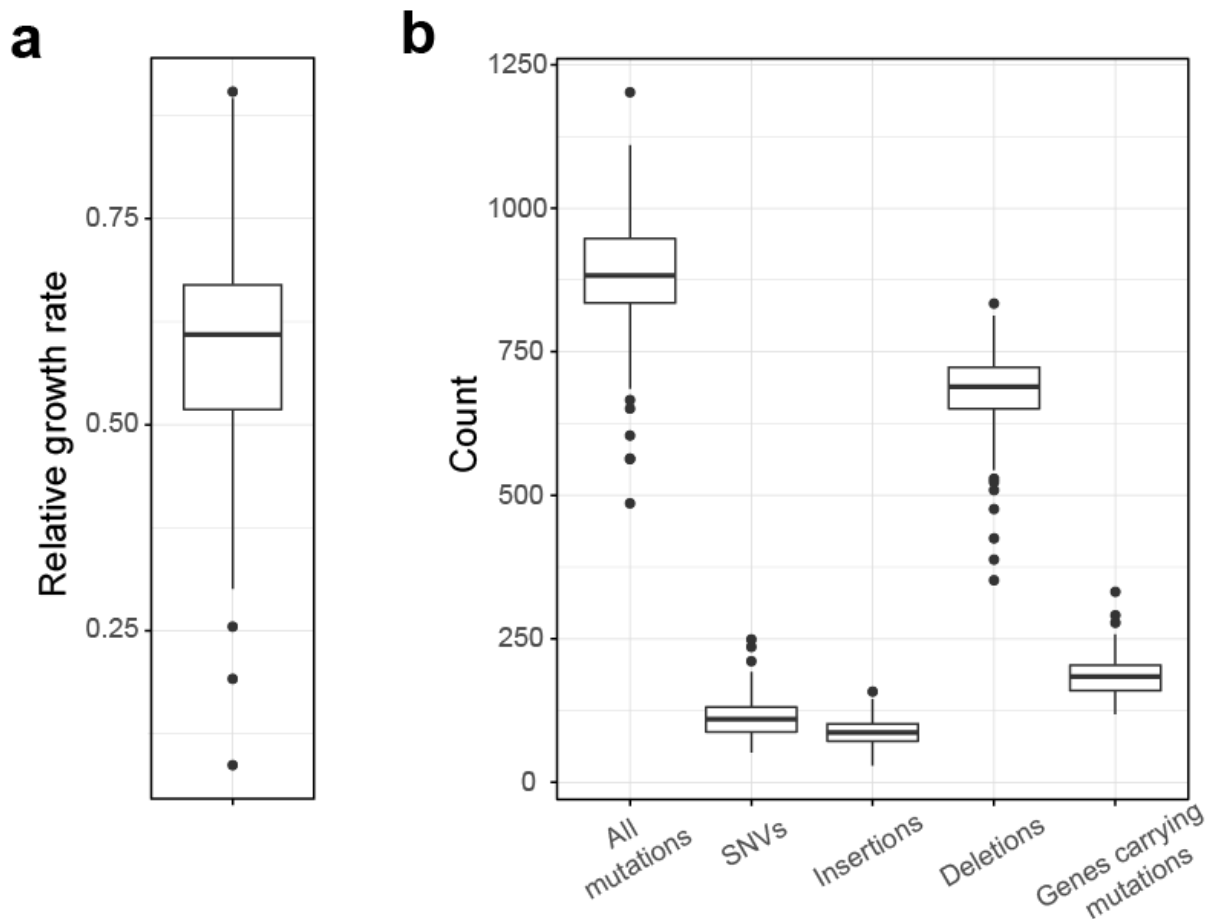

**Supplementary Fig. 1. Growth rates of and mutations accumulated in the MA lines. a,** Distribution of the growth rates of the 93 MA lines relative to that of the progenitor in liquid YPD medium. Growth rates of all strains, including the progenitor, were measured in the *MSH2*-lacking background. **b,** Distributions of numbers of various mutations and number of genes carrying mutations among the 93 MA lines. In each box plot, the lower and upper edges of a box represent the first (qu1) and third quartiles (qu3), respectively, and the horizontal line inside the box indicates the median (md). The whiskers extend to the most extreme values inside inner fences,  $md \pm 1.5(qu3 - qu1)$ , and the dots represent values outside the inner fences (outliers).

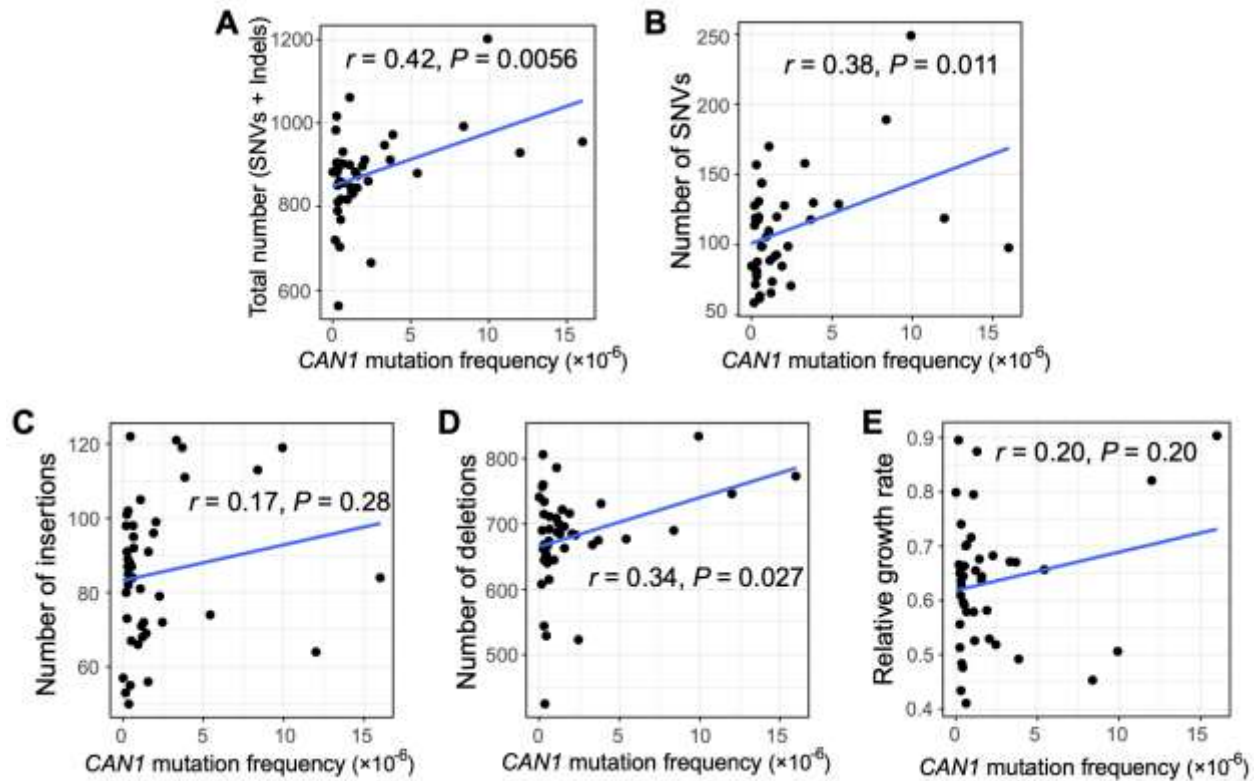

**Supplementary Fig. 2. The *CAN1* mutation frequency of an MA line is significantly correlated with the number of mutations accumulated in the MA line but is not significantly correlated with its relative growth rate. a-d,** Correlation between the *CAN1* mutation frequency and the total number of SNVs and indels (a), number of SNVs (b), number of insertions (c), or number of deletions (d) accumulated among 44 haploid MA lines. e, Correlation between the *CAN1* mutation frequency of an MA line and its growth rate relative to the progenitor among 44 haploid MA lines. In all panels, each dot represents one MA line and the blue line is the linear regression. Pearson's correlation coefficient ( $r$ ) and associated  $P$ -value are presented. Growth rates were all measured in liquid YPD medium in the *MSH2*-lacking background.



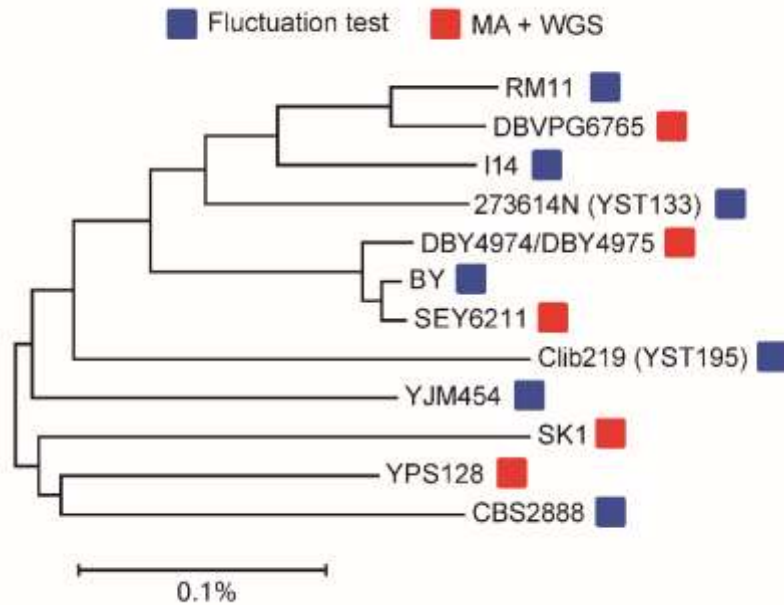

**Supplementary Fig. 3. Evolutionary relationships among the natural yeast strains considered in this study.** The tree was reconstructed by the neighbor-joining method with  $p$ -distance based on genome-wide SNVs. Strains with available fluctuation test-based *CAN1* mutation frequencies are marked by blue squares, whereas strains with MA+WGS-based estimates of mutation rate and spectrum are marked by red squares. The average genetic distance among the 7 strains marked in blue is 0.31% and that among the 5 strains marked in red is 0.30%. The progenitor for MA is derived from BY.

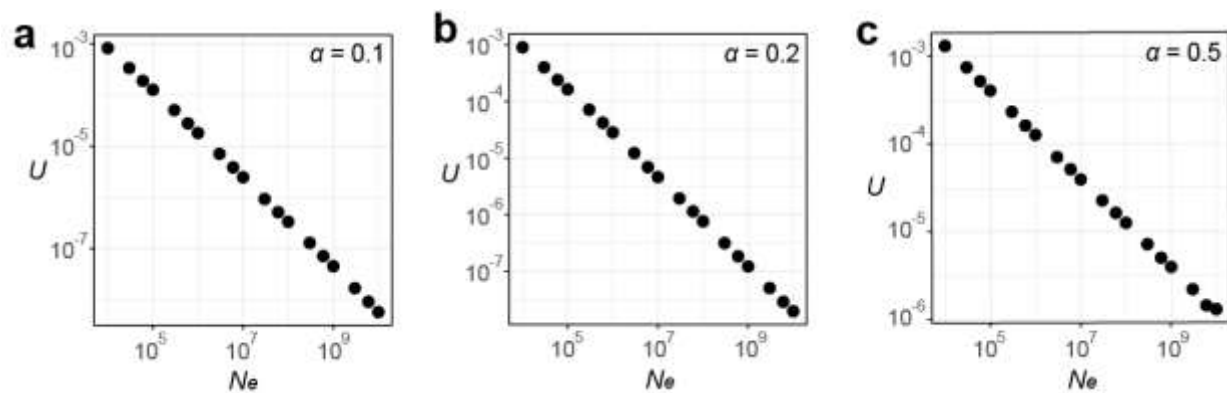

**Supplementary Fig 4. The optimal mutation rate per functional genome per generation ( $U$ ) declines with the effective population size ( $N_e$ ) under the two second-order selections.**

Fitness disadvantages of deleterious mutations follow a gamma distribution with the mean equal to 0.01. Three gamma distributions with different shape parameters ( $\alpha$ ) are considered in the three panels, respectively.
