# Supplementary material for: The rate and molecular spectrum of mutation are selectively maintained in yeast
Source: PubMed Central journal article supplement (PMC8245649; doi:10.1038/s41467-021-24364-6), 2021-06-30
Supplement: 41467_2021_24364_MOESM4_ESM.pdf [file 41467_2021_24364_MOESM4_ESM.pdf]

## **Description of Additional Supplementary Files**

File Name: Supplementary Data 1

Description: Mutations identified in two rounds of mutation accumulation and CAN1 mutation frequencies.
